# Supplementary material
Source: PubMed Central journal article supplement (PMC2683050)

## SUPPLEMENTARY DATA

**Figure S1. Genome integrity of vSOCS viruses in the *Bam*HI-G region.** BHK-21 cells were infected with the indicated MuHV-4 viruses. High molecular weight DNA was extracted and used as template in PCR reactions. A schematic representation of the *Bam*HI-G region of the MuHV-4 genome and amplicon coordinates for each PCR are shown.

**Figure S2. ORF73-SOCS viruses show normal in vitro replication.** BHK-21 cells were infected with vSOCS and vSOCSi compared with wild type and 73FS viruses, at a low multiplicity of infection (0.01 p.f.u. per cell). After 1 hour of virus adsorption, cells were washed and at the indicated times post-infection virus titers were determined by plaque assay.

## Supplementary Figure S1

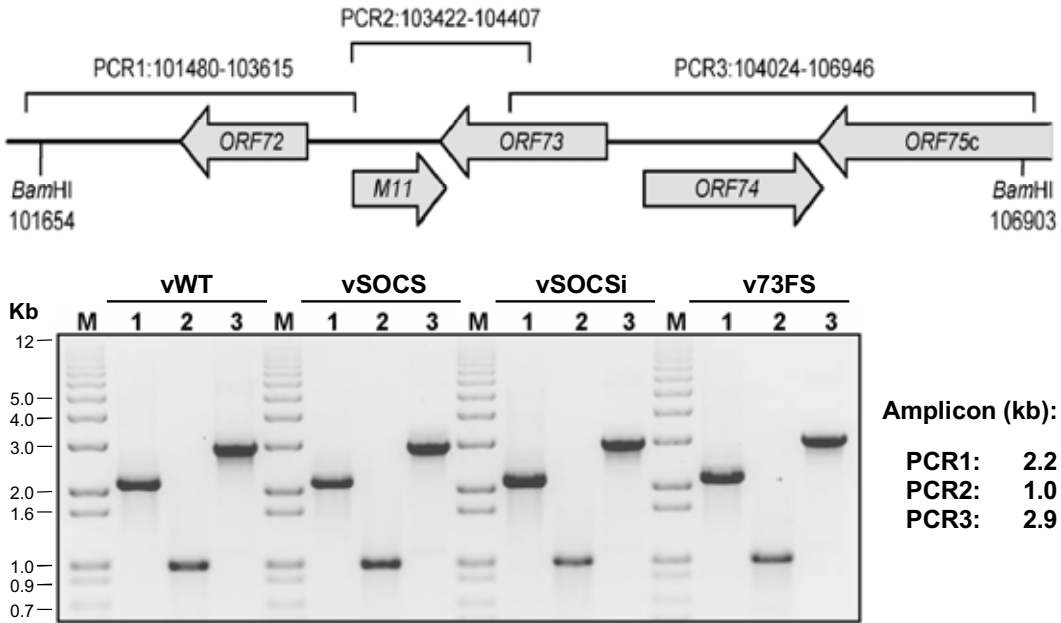

## Supplementary Figure S2

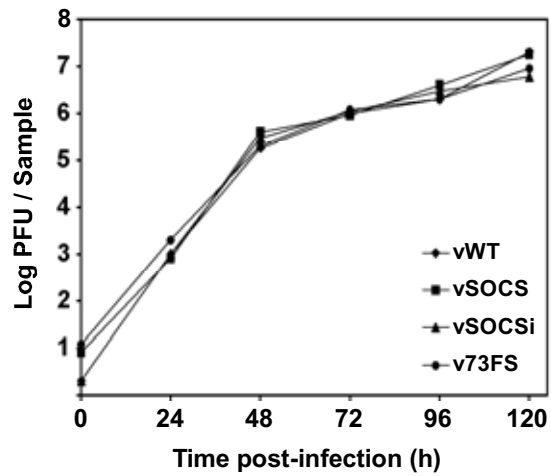

Supplement: emboj200974s1.pdf [file emboj200974s1.pdf]
